# Supplementary material for: Identification of a Dolabellane Type Diterpene Synthase and other Root-Expressed Diterpene Synthases in Arabidopsis
Source: PubMed Central journal article supplement (PMC5122590; doi:10.3389/fpls.2016.01761), 2016-11-25
Supplement: Data_Sheet_1.pdf [file Data_Sheet_1.pdf]

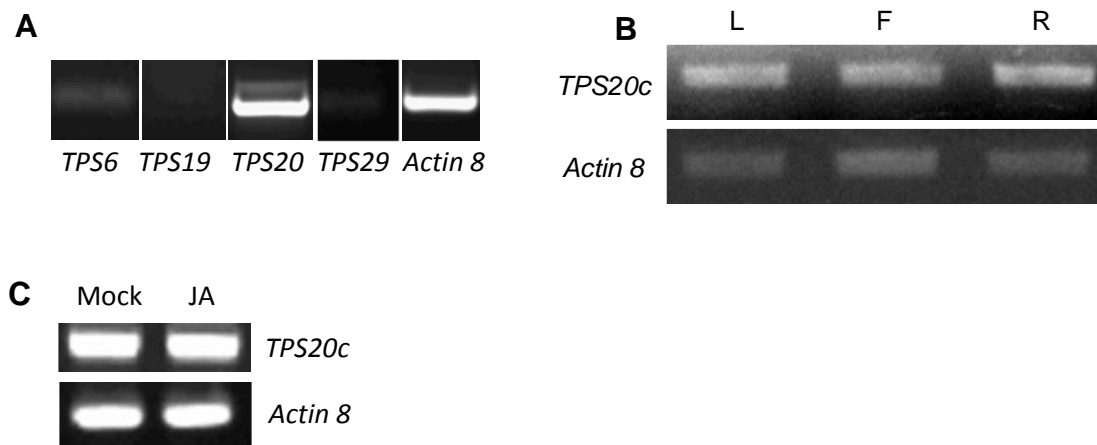

**Figure S1. *TPS* gene expression in *Cvi*.** (A) Expression of selected *TPS* genes in the *Cvi* root. (B) *TPS20c* gene expression in *Cvi* tissues. L: leaf; F: flower; R: root. (C) *TPS20c* gene expression in axenically grown roots of *Cvi* upon 24 h of treatment with 100  $\mu$ M jasmonic acid.

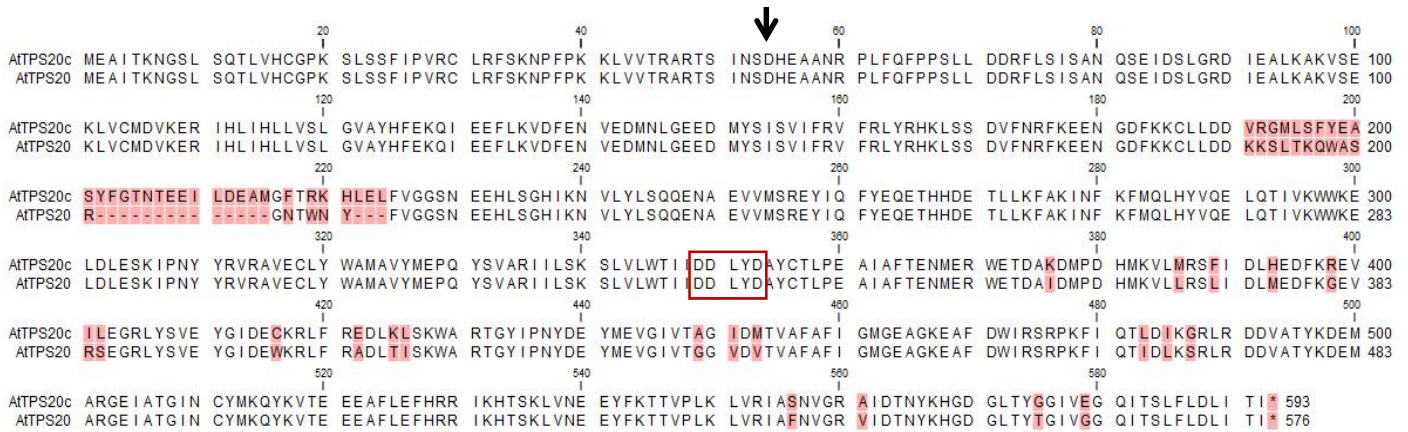

**Figure S2. Amino acid sequence alignment of TPS20 (Col ecotype) and TPS20c (Cvi ecotype).** Amino acid insertions and substitutions are highlighted in pink. The DDXXD motif is indicated with a red box. The arrow shows the position of the truncation of the transit peptide for protein expression in *E.coli* and transit peptide fusion to eGFP for transient expression in tobacco leaves.

|          |            |            |            |             |             |            |            |            |             |            |      |
|----------|------------|------------|------------|-------------|-------------|------------|------------|------------|-------------|------------|------|
|          |            |            | 20         |             | 40          |            | 60         |            | 80          |            | 100  |
| AITPS20c | ATGGAAGCAA | TAACTAAAA  | TGGGTCGCTC | TCTCAAACCTC | TTGTTTCATTG | TGGGCCAAAA | AGCTTGAGCT | CGTTCATCCC | AGTTTCGCTGT | CTTAGGTTTT | 100  |
| AITPS20  | ATGGAAGCAA | TAACTAAAA  | TGGGTCGCTC | TCTCAAACCTC | TTGTTTCATTG | TGGGCCAAAA | AGCTTGAGCT | CGTTCATCCC | AGTTTCGCTGT | CTTAGGTTTT | 100  |
|          |            | 120        |            | 140         |             | 160        |            | 180        |             | 200        |      |
| AITPS20c | CTAAGAATCC | GTTCCCCAAA | AAGTTGGTCC | TAAGTAGAGC  | TAGGACGAGC  | ATTAACAGTG | ATCATGAAGC | CGCAAATCGT | CCGTTATTTTC | AGTTTCCACC | 200  |
| AITPS20  | CTAAGAATCC | GTTCCCCAAA | AAGTTGGTCC | TAAGTAGAGC  | TAGGACGAGC  | ATTAACAGTG | ATCATGAAGC | CGCAAATCGT | CCGTTATTTTC | AGTTTCCACC | 200  |
|          |            | 220        |            | 240         |             | 260        |            | 280        |             | 300        |      |
| AITPS20c | TTCCCTATTG | GATGATCGCT | TCCTTTCCAT | TTCCGCCAAC  | CAGTCGGAAA  | TTGATAGCCT | TGGGAGAGAT | ATCGAGGCAC | TTAAGGCTAA  | AGTGAGTGAA | 300  |
| AITPS20  | TTCCCTATTG | GATGATCGCT | TCCTTTCCAT | TTCCGCCAAC  | CAGTCGGAAA  | TTGATAGCCT | TGGGAGAGAT | ATCGAGGCAC | TTAAGGCTAA  | AGTGAGTGAA | 300  |
|          |            | 320        |            | 340         |             | 360        |            | 380        |             | 400        |      |
| AITPS20c | AAGCTGGTTT | GTATGGACGT | AAAGGAGAGG | ATTCACCTGA  | TCCATCTGCT  | AGTCAGTCTT | GGAGTCGCTT | ACCATTTTCG | GAAACAGATC  | GAAGAATTCC | 400  |
| AITPS20  | AAGCTGGTTT | GTATGGACGT | AAAGGAGAGG | ATTCACCTGA  | TCCATCTGCT  | AGTCAGTCTT | GGAGTCGCTT | ACCATTTTCG | GAAACAGATC  | GAAGAATTCC | 400  |
|          |            | 420        |            | 440         |             | 460        |            | 480        |             | 500        |      |
| AITPS20c | TGAAAGTTGA | TTTCGAGAAC | GTGGAGGATA | TGAACCTGGG  | AGAAGAGSAT  | ATGTATAGCA | TTTCTGTCAT | CTTCAGGGTT | TTTAGGCTGT  | ACCGTCACAA | 500  |
| AITPS20  | TGAAAGTTGA | TTTCGAGAAC | GTGGAGGATA | TGAACCTGGG  | AGAAGAGSAT  | ATGTATAGCA | TTTCTGTCAT | CTTCAGGGTT | TTTAGGCTGT  | ACCGTCACAA | 500  |
|          |            | 520        |            | 540         |             | 560        |            | 580        |             | 600        |      |
| AITPS20c | GTTATCTTCC | GATGTGTTCA | ATAGGTTTAA | AGAAGAAAAT  | GGGGATTTTA  | AGAAATGCCT | TCTCGATGAT | GTAAGAGGTA | TGCTAAGCTT  | CTACGAAAGT | 600  |
| AITPS20  | GTTATCTTCC | GATGTGTTCA | ATAGGTTTAA | AGAAGAAAAT  | GGGGATTTTA  | AGAAATGCCT | TCTCGATGAT | -----      | -----       | -----      | 570  |
|          |            | 620        |            | 640         |             | 660        |            | 680        |             | 700        |      |
| AITPS20c | TCATATTTTG | GGACGAATAC | AGAAGAAATC | CTTGACGAAG  | CAATGGGCTT  | CACGCGGAAA | CACCTGGAAC | TATTTGTTG  | GAGGCAGCAA  | TGAGGAACAT | 699  |
| AITPS20  | -----      | -----      | AGAAGAAATC | CTTGACGAAG  | CAATGGGCTT  | CACGCGGAAA | CACCTGGAAC | TATTTGTTG  | GAGGCAGCAA  | TGAGGAACAT | 648  |
|          |            | 720        |            | 740         |             | 760        |            | 780        |             | 800        |      |
| AITPS20c | TTATCTGGGC | ACATAAAAAA | CGTGTGTGAT | CTTTCTCAGC  | AAGAAAAATG  | AGAGGTGGTG | ATGTCAAGAG | AATATATACA | GTTCTATGAA  | CAAGAGACAC | 799  |
| AITPS20  | TTATCTGGGC | ACATAAAAAA | CGTGTGTGAT | CTTTCTCAGC  | AAGAAAAATG  | AGAGGTGGTG | ATGTCAAGAG | AATATATACA | GTTCTATGAA  | CAAGAGACAC | 748  |
|          |            | 820        |            | 840         |             | 860        |            | 880        |             | 900        |      |
| AITPS20c | ATCACGACGA | GACCTTGCTA | AAATTTGCCA | AGATCAATTT  | CAAGTTCATG  | CAGTTGCATT | ATGTTCAAGA | GCTTCAAAC  | ATCGTGAAAT  | GGTGGAAAGA | 899  |
| AITPS20  | ATCACGACGA | GACCTTGCTA | AAATTTGCCA | AGATCAATTT  | CAAGTTCATG  | CAGTTGCATT | ATGTTCAAGA | GCTTCAAAC  | ATCGTGAAAT  | GGTGGAAAGA | 848  |
|          |            | 920        |            | 940         |             | 960        |            | 980        |             | 1,000      |      |
| AITPS20c | GCTTGACTTG | GAATCAAAGA | TCCCTAATTA | CTACAGAGTT  | AGAGCCGTGG  | AGTGCCTCTA | CTGGGCAATG | GCAGTGATA  | TGGAGCCACA  | ATATTCAGTT | 999  |
| AITPS20  | GCTTGACTTG | GAATCAAAGA | TCCCTAATTA | CTACAGAGTT  | AGAGCCGTGG  | AGTGCCTCTA | CTGGGCAATG | GCAGTGATA  | TGGAGCCACA  | ATATTCAGTT | 948  |
|          |            | 1,020      |            | 1,040       |             | 1,060      |            | 1,080      |             | 1,100      |      |
| AITPS20c | GCTAGAATAA | TACTGAGCAA | GTCCTTGGTG | TTGTGGACCA  | TTATAGATGA  | CCTATATGAT | GCCTATTGTA | CTCTCCAGA  | AGCTATTGCT  | TTCAGTAAA  | 1099 |
| AITPS20  | GCTAGAATAA | TACTGAGCAA | GTCCTTGGTG | TTGTGGACCA  | TTATAGATGA  | CCTATATGAT | GCCTATTGTA | CTCTCCAGA  | AGCTATTGCT  | TTCAGTAAA  | 1048 |
|          |            | 1,120      |            | 1,140       |             | 1,160      |            | 1,180      |             | 1,200      |      |
| AITPS20c | ATATGAAAAG | GTGGGAAACT | GATGCCAATG | ACATGCCAGA  | TCATATGAAG  | GTCCTCTATG | GGTCATTGAT | AGACCTTAC  | GAAGATTTCA  | AAGGAGAAGT | 1199 |
| AITPS20  | ATATGAAAAG | GTGGGAAACT | GATGCCAATG | ACATGCCAGA  | TCATATGAAG  | GTCCTCTATG | GGTCATTGAT | AGACCTTATG | GAAGATTTCA  | AAGGAGAAGT | 1148 |
|          |            | 1,220      |            | 1,240       |             | 1,260      |            | 1,280      |             | 1,300      |      |
| AITPS20c | GATTTTAGAA | GGGAGATTGT | ACAGTGTGGA | ATATGGAATA  | GACGAGTGA   | AAAGATTATT | CAGAGAGGAC | CTTAACTAT  | CAAAGTGGGC  | ACGCACGGGA | 1299 |
| AITPS20  | GAGATCAGAA | GGGAGATTGT | ACAGTGTGGA | ATATGGAATA  | GACGAGTGA   | AAAGACTATT | CAGAGCGGAC | CTTACAATAT | CAAAGTGGGC  | ACGCACGGGA | 1248 |
|          |            | 1,320      |            | 1,340       |             | 1,360      |            | 1,380      |             | 1,400      |      |
| AITPS20c | TACATACCAA | ACTATGACGA | ATACATGGAG | GTTGGAATAG  | TGACTCGGGG  | AATAGATATG | ACGGTTGCGT | TCGCCTTCAT | TGGTATGGGG  | GAGGCAGGAA | 1399 |
| AITPS20  | TACATACCAA | ACTATGACGA | ATACATGGAG | GTTGGAATAG  | TGACTCGGGG  | AGTAGATGTC | ACGGTTGCGT | TCGCCTTCAT | TGGTATGGGG  | GAGGCAGGAA | 1348 |
|          |            | 1,420      |            | 1,440       |             | 1,460      |            | 1,480      |             | 1,500      |      |
| AITPS20c | AAGAAGCTTT | TGACTGGATA | AGATCAAGAC | CGAAATTCAT  | TCAAACCTA   | GATAAAAAAG | CAGCTCTCAG | AGATGATGTT | GCCACCTACA  | AGGATGAAAT | 1499 |
| AITPS20  | AAGAAGCTTT | TGACTGGATA | AGATCAAGAC | CGAAATTCAT  | TCAAACCTA   | GATCTAAAAA | CAGCTCTCAG | AGATGATGTT | GCCACCTACA  | AGGATGAAAT | 1448 |
|          |            | 1,520      |            | 1,540       |             | 1,560      |            | 1,580      |             | 1,600      |      |
| AITPS20c | GGCTAGAGGA | GAGATTGCGA | CAGGAATCAA | CTGCTATATG  | AAACAATATA  | AAGTTACCGA | AGAAGAAGCG | TTTCTAGAGT | TTCATAGAAG  | GATTAACAT  | 1599 |
| AITPS20  | GGCTAGAGGA | GAGATTGCGA | CAGGAATCAA | CTGCTATATG  | AAACAATATA  | AAGTTACCGA | AGAAGAAGCG | TTTCTAGAGT | TTCATAGAAG  | GATTAACAT  | 1548 |
|          |            | 1,620      |            | 1,640       |             | 1,660      |            | 1,680      |             | 1,700      |      |
| AITPS20c | ACTTCTAAGC | TAGTGAATGA | AGAGTATTTT | AAGACGACAG  | TACCTTTGAA  | ACTTGTGGGT | ATAGCTTCTA | ACGTTGGACG | GGCTATCGAT  | ACCAACTION | 1699 |
| AITPS20  | ACTTCTAAGC | TAGTGAATGA | AGAGTATTTT | AAGACGACAG  | TACCTTTGAA  | ACTTGTGGGT | ATAGCTTTTA | ACGTTGGACG | GGTTATCGAT  | ACCAACTION | 1648 |
|          |            | 1,720      |            | 1,740       |             | 1,760      |            | 1,780      |             | 1,800      |      |
| AITPS20c | AGCATGGCGA | TGGATTAACC | TATGGAGGGA | TAGTAGAAGG  | CCAGATCACC  | TCTTTATTCC | TTGATCTAAT | CACCATTTAG |             |            | 1779 |
| AITPS20  | AGCATGGCGA | TGGATTAACC | TATACAGGGA | TAGTAGAAGG  | CCAAATCACC  | TCTTTGTTCC | TTGATCTAAT | CACCATTTAG |             |            | 1728 |

**Figure S3. Nucleotide sequence alignment of *TPS20* (ecotype Col) and *TPS20c* (ecotype Cvi).** The *TPS20c* sequence has a single nucleotide deletion (675\_676del) and a 52 bp insertion (571G to 622G) in comparison to the *TPS20* sequence. Nucleotide insertions, deletions, and substitutions are highlighted in pink.

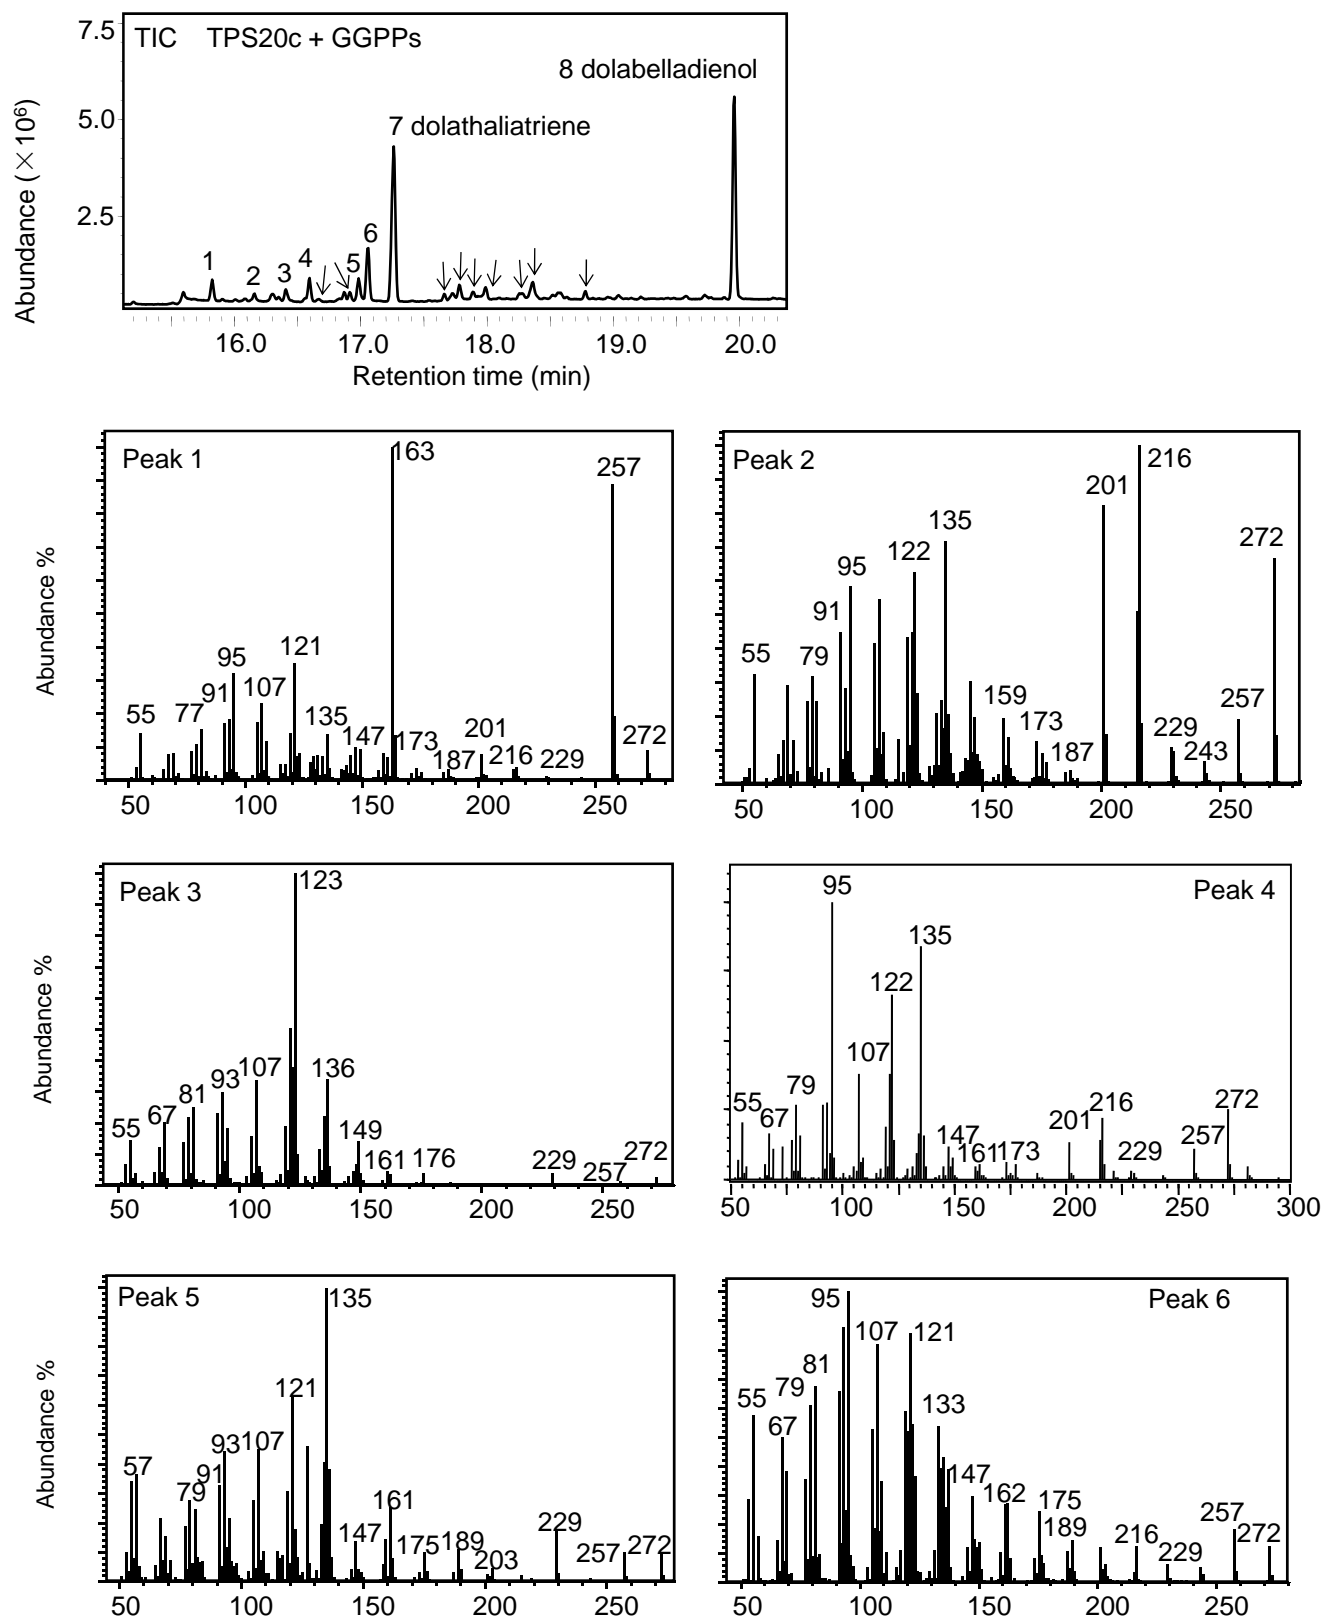

**Figure S4. Mass spectra of minor diterpene products 1-6 of TPS20c.**

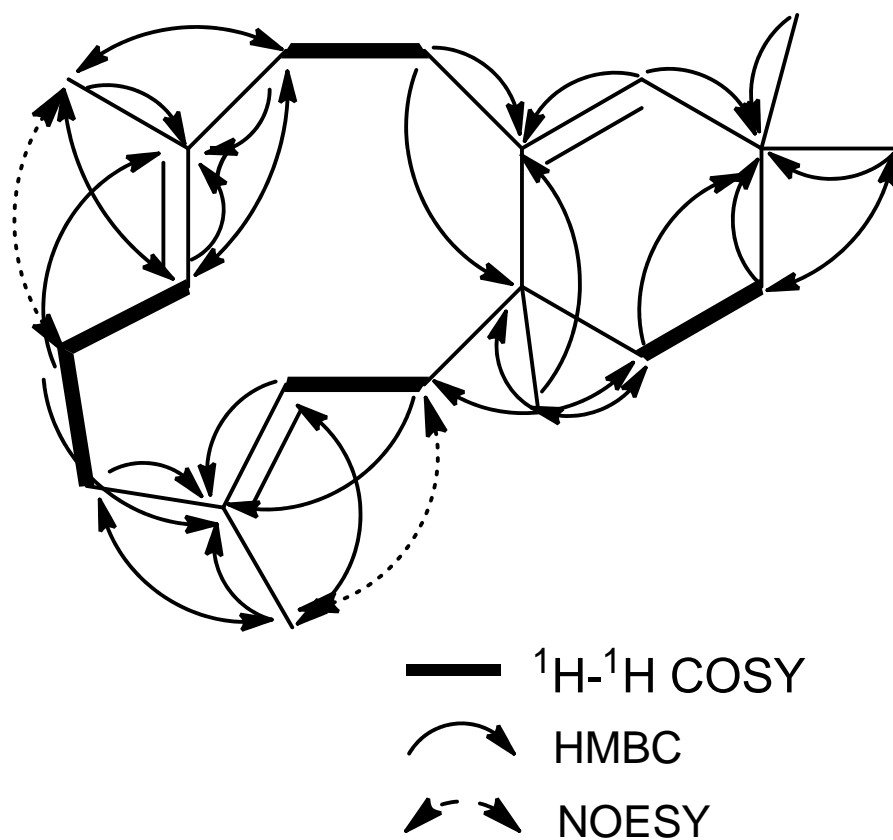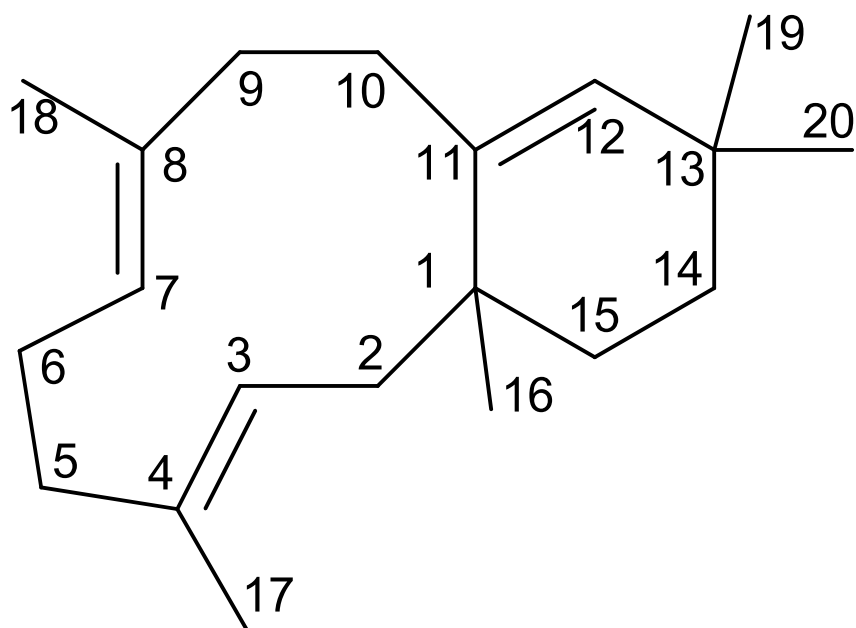

**Figure S5. Important correlations of COSY, HMBC and NOESY observed for the major diterpene product of TPS20c.**

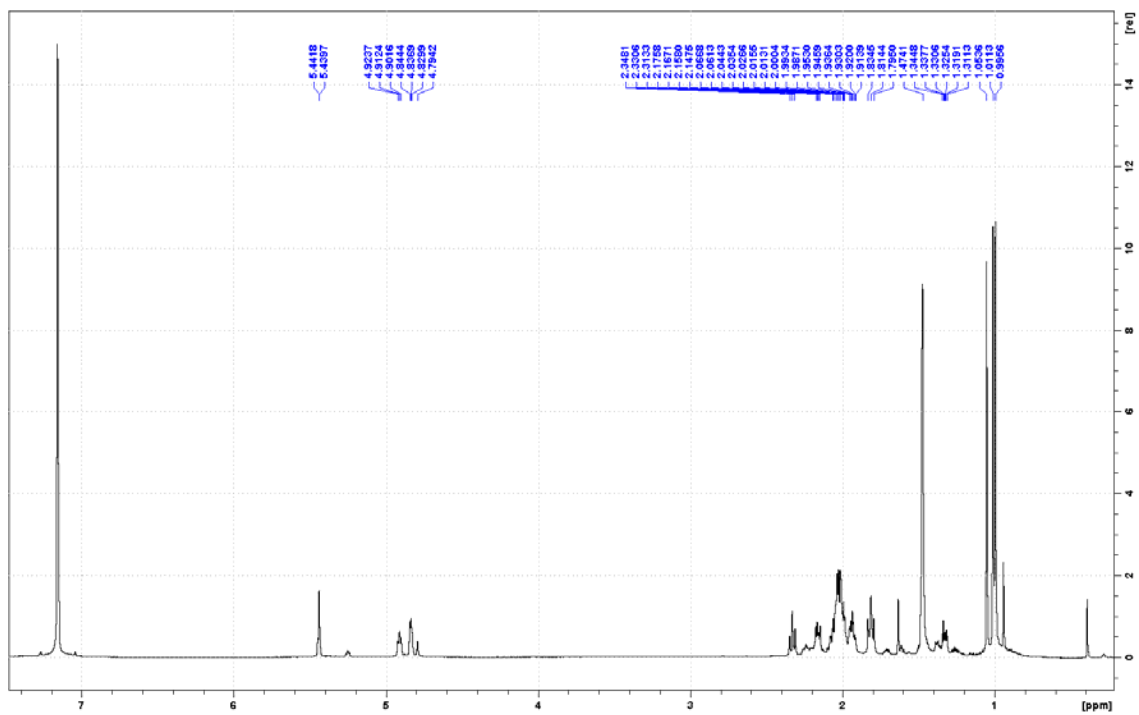

**Figure S6.**  $^1\text{H}$  spectrum of the TPS20c major diterpene compound (solvent  $\text{C}_6\text{D}_6$ ).

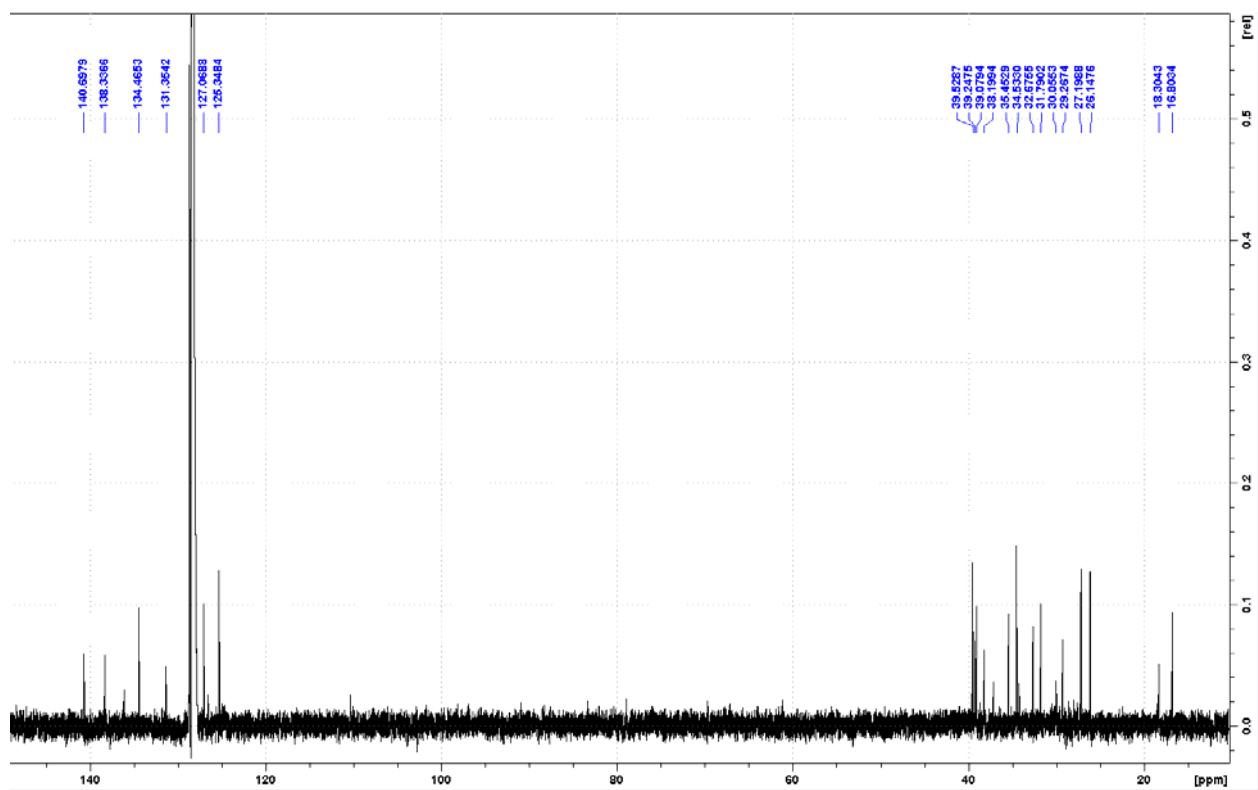

Figure S7.  $^{13}\text{C}$  spectrum of the TPS20c major diterpene compound (solvent  $\text{C}_6\text{D}_6$ ).

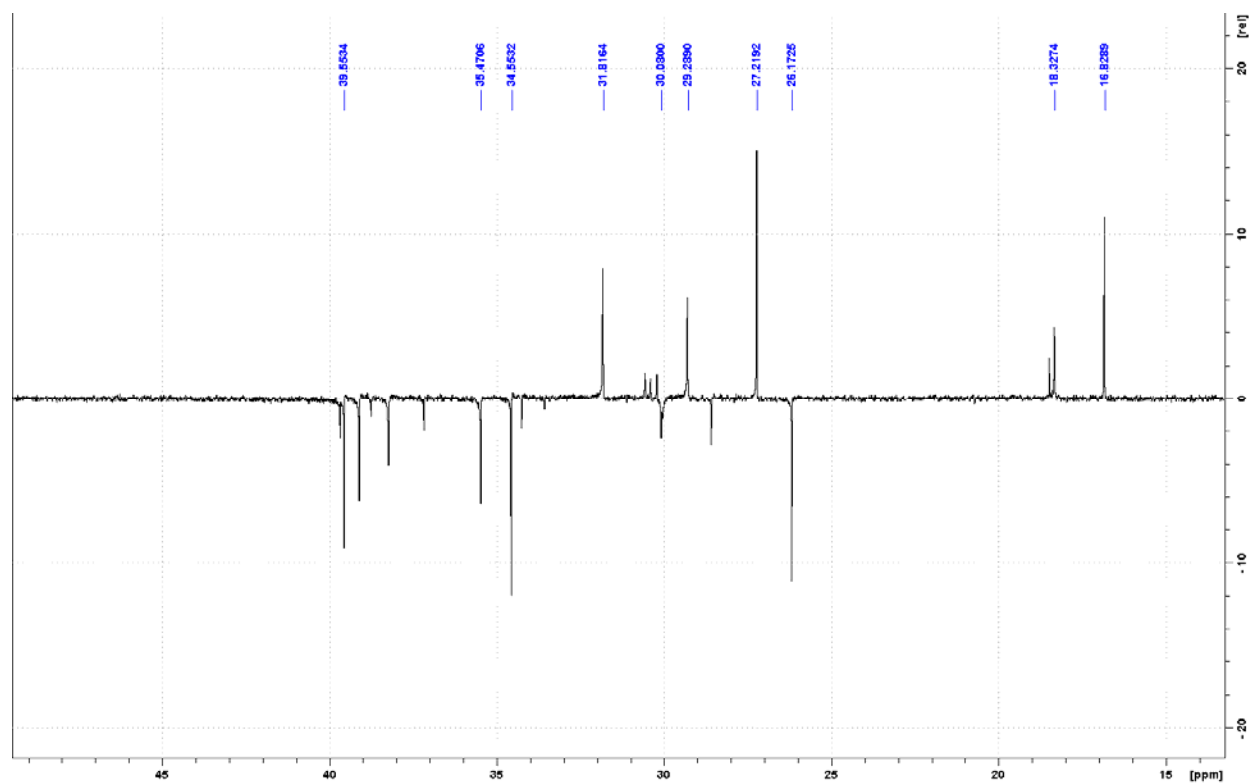

**Figure S8A.**  $^{13}\text{C}$  DEPT135 of the TPS20c major diterpene compound (solvent  $\text{C}_6\text{D}_6$ ).



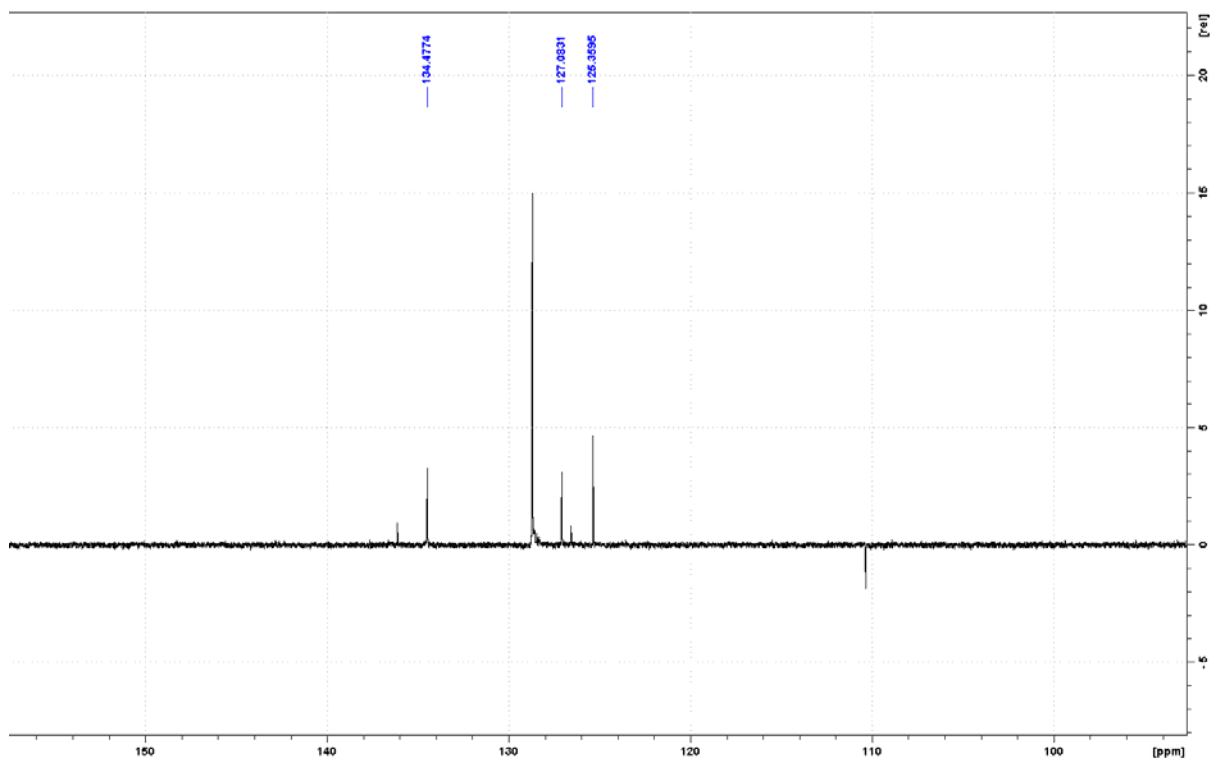

**Figure S8B.**  $^{13}\text{C}$  DEPT135 of the TPS20c major diterpene compound (solvent  $\text{C}_6\text{D}_6$ ).

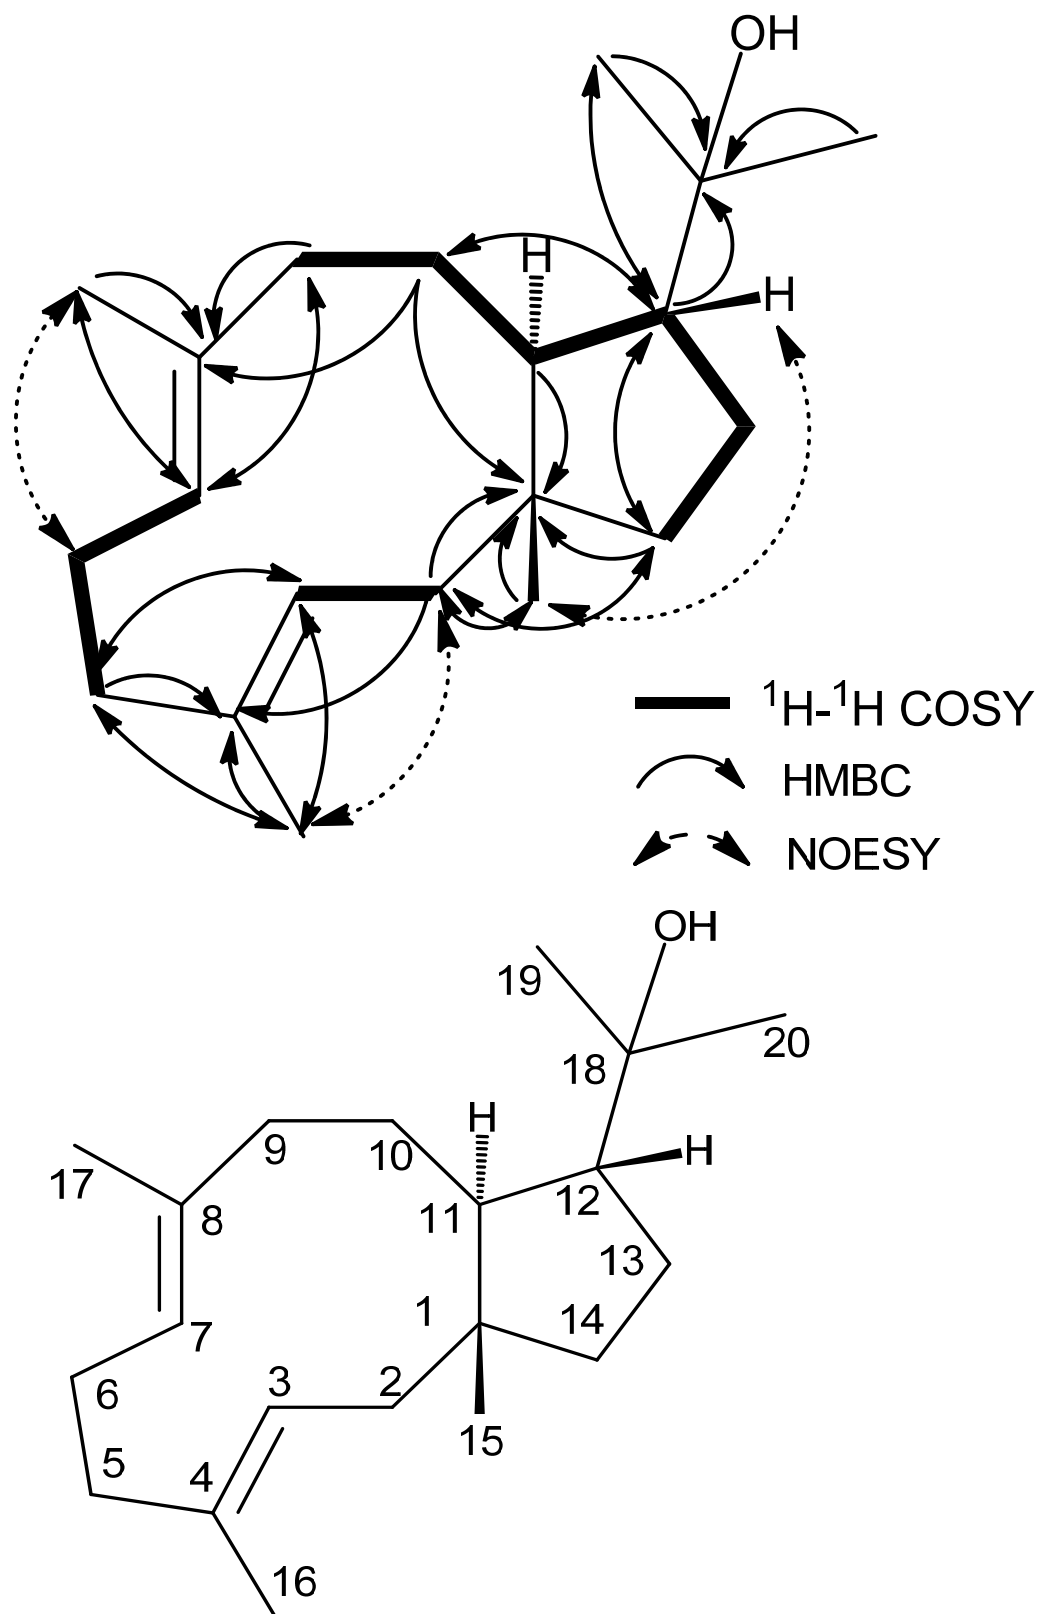

**Figure S9. Important correlations of COSY, HMBC and NOESY observed for the major diterpene alcohol product of TPS20c.**

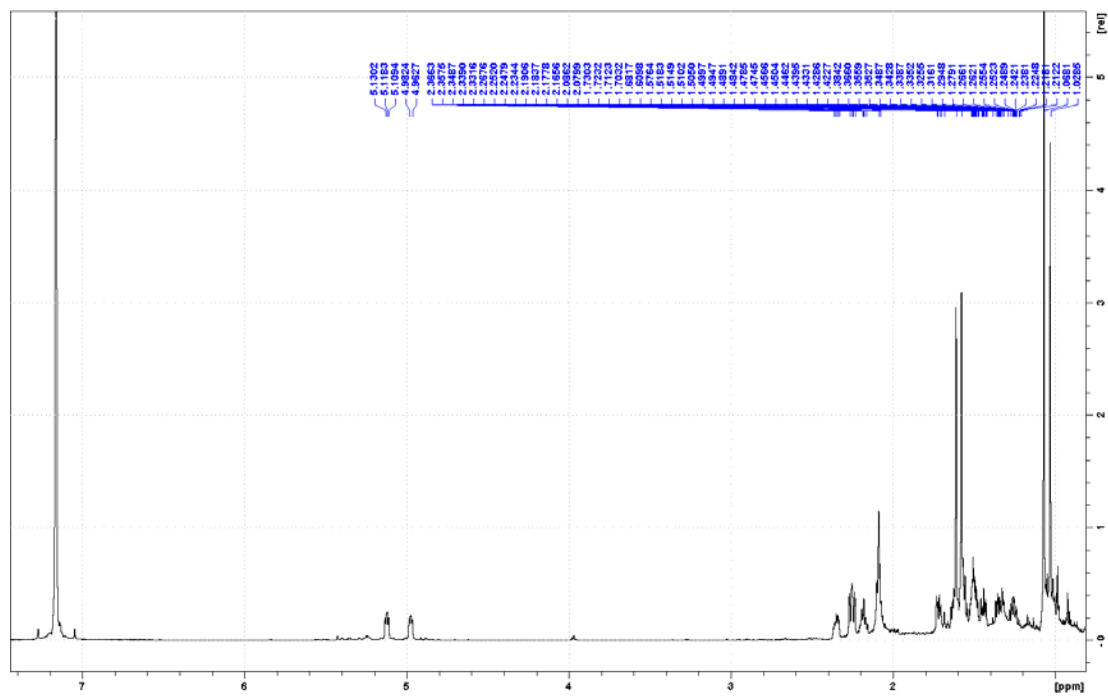

**Figure S10.**  $^1\text{H}$  spectrum of the TPS20c diterpene alcohol compound (solvent  $\text{C}_6\text{D}_6$ ).

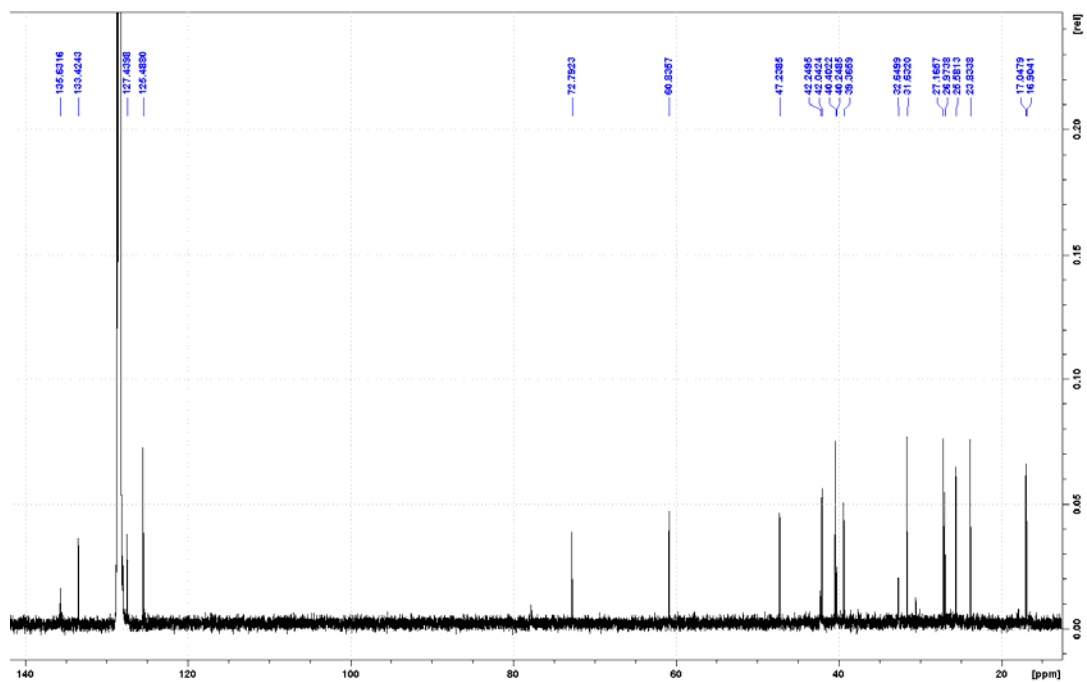

Figure S11. <sup>13</sup>C spectrum of the TPS20c diterpene alcohol compound (solvent C<sub>6</sub>D<sub>6</sub>).

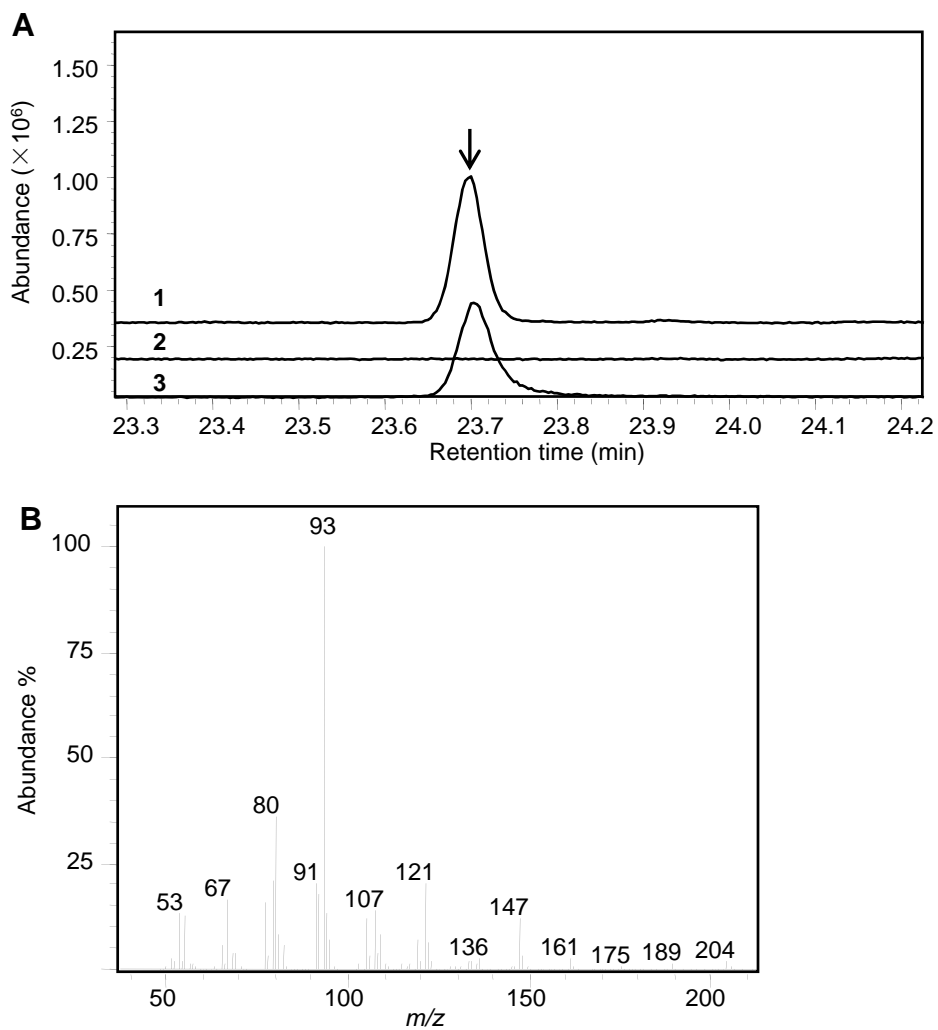

**Figure S12. TPS20c reacts with (*E,E*)-FPP to produce  $\alpha$ -humulene. (A)** GC-MS chromatogram of an extract from *E. coli* coexpressing TPS20c and (*E,E*)-FPP synthase. 1, co-expression of TPS20c and (*E,E*)-FPP synthase. 2, co-expression of empty vector and (*E,E*)-FPP synthase. 3, standard of  $\alpha$ -humulene. **(B)** Mass spectrum of  $\alpha$ -humulene (arrow marked).

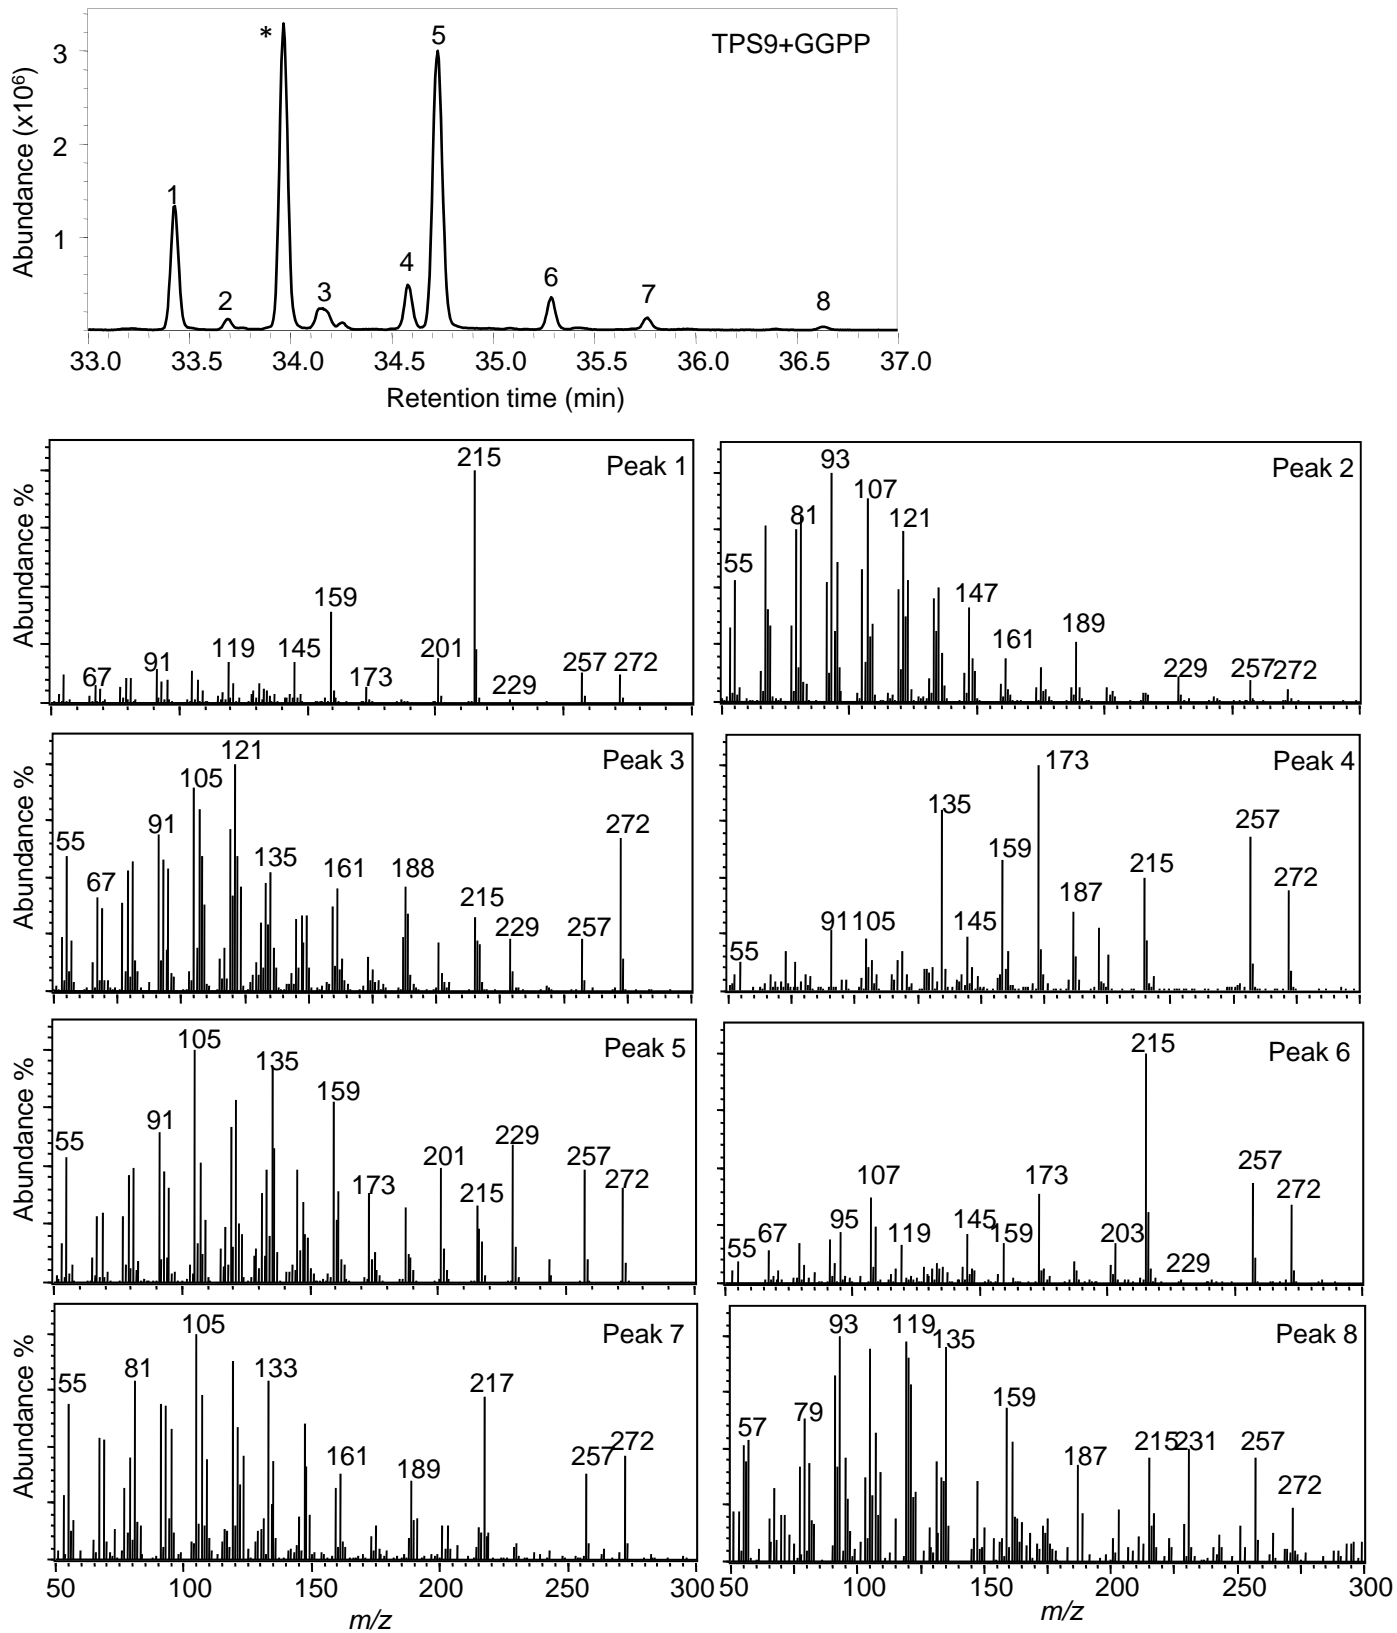

**Figure S13. Mass spectra of minor diterpene products of recombinant TPS9.**  
 The mass spectrum of the major diterpene product (labeled with asterisk) is shown in Figure 7C.

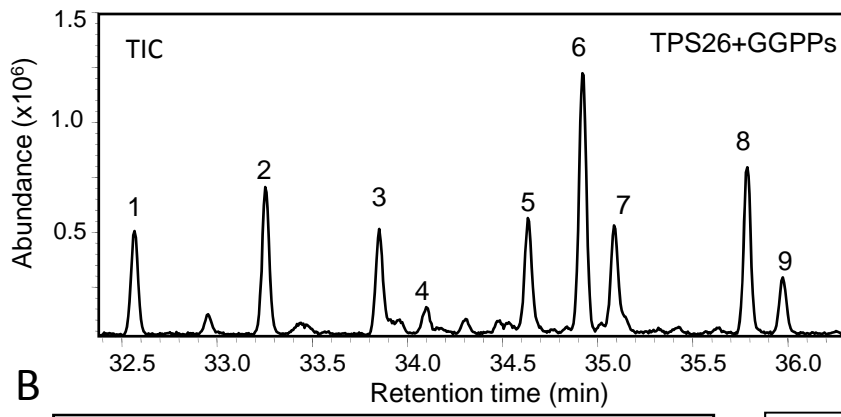

A

**Figure S14. Diterpene synthase activity of Col TPS26.** (A) GC-MS chromatogram of a culture extract from *E. coli* coexpressing TPS26 and GGPP synthase. (B) Mass spectra of TPS26 products.

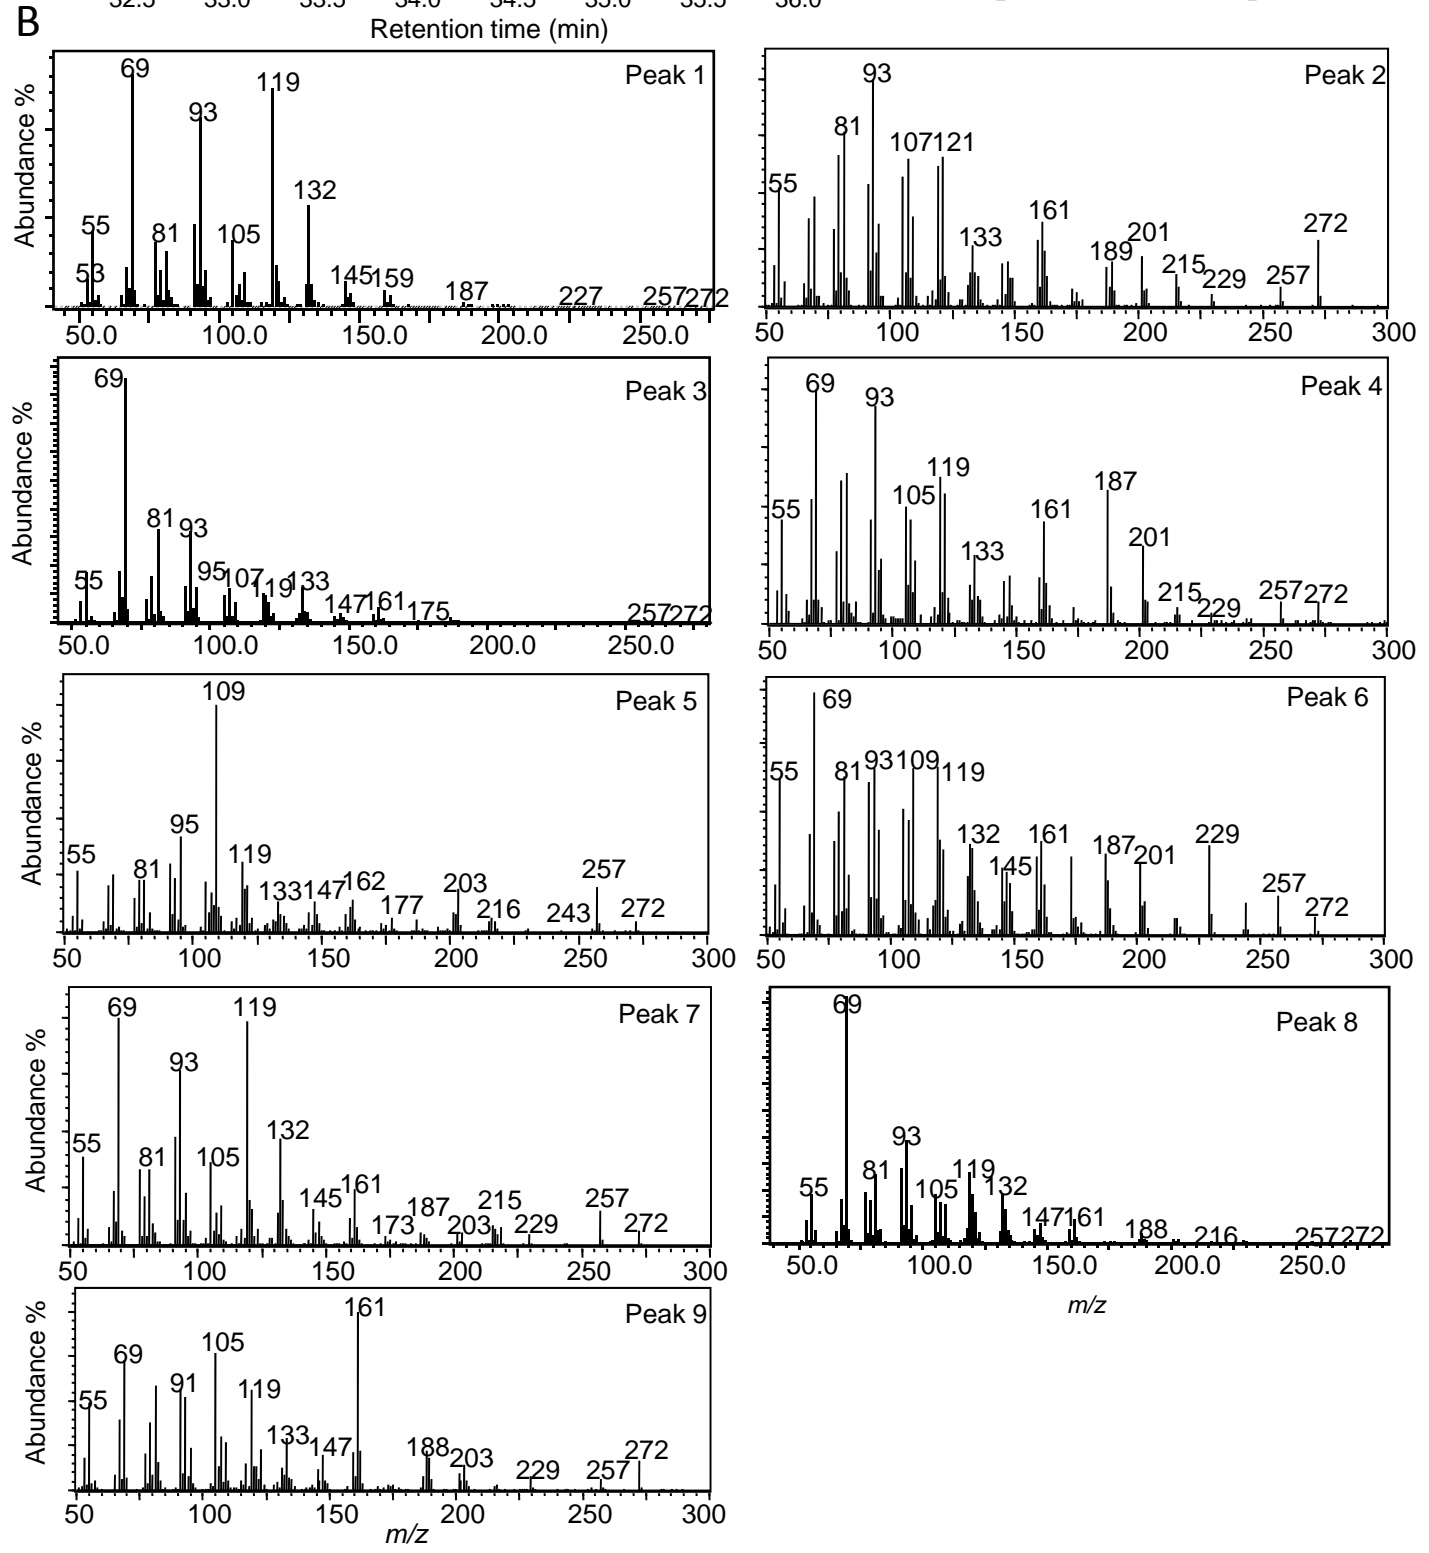

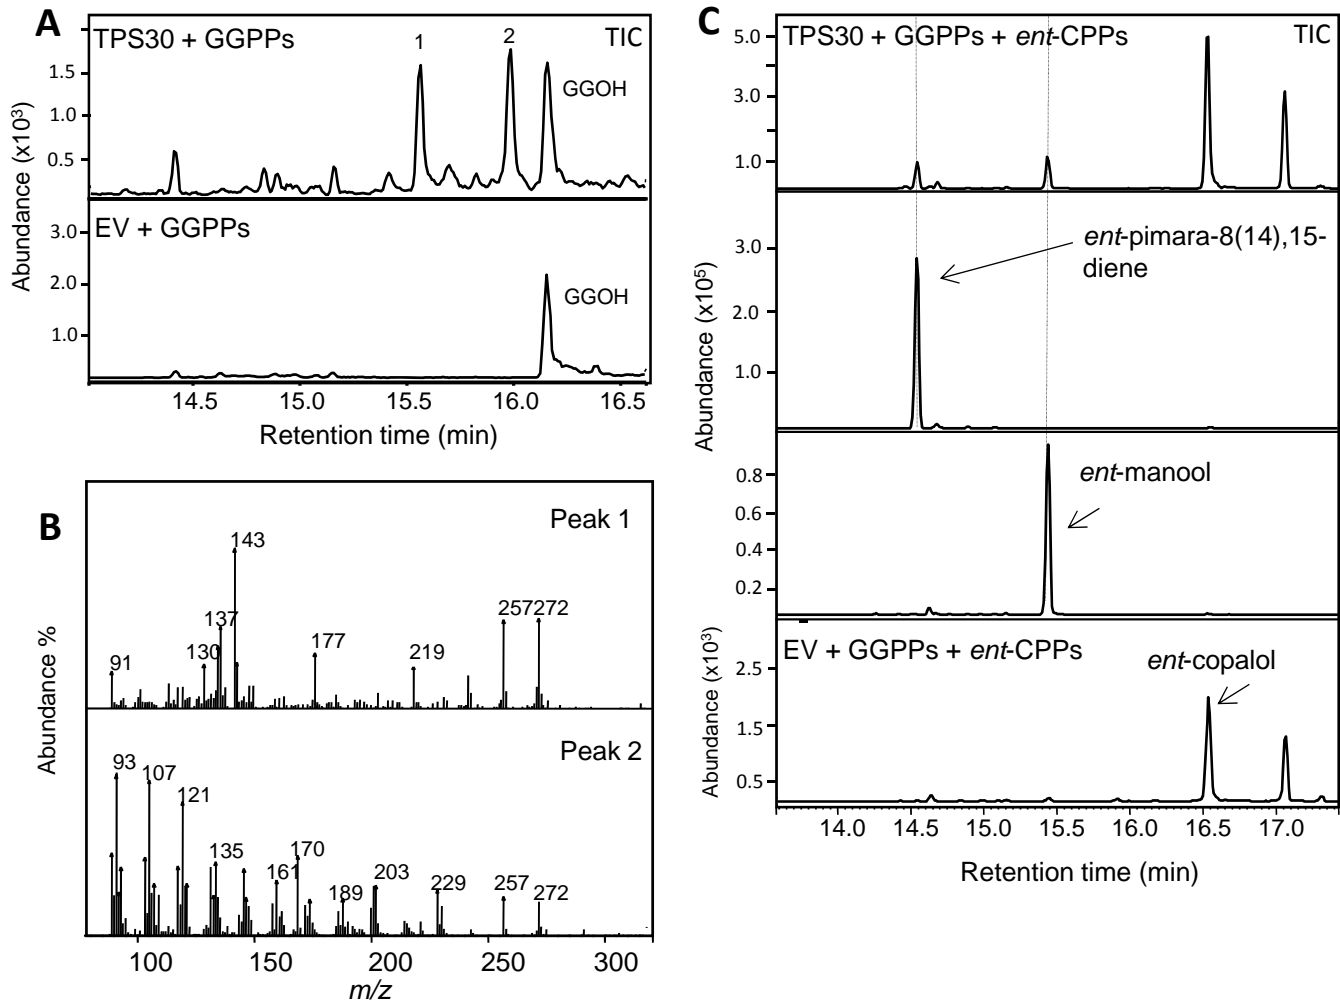

**Figure S15. Diterpene synthase activity of Col TPS30.** (A) Upper panel: GC-MS chromatogram of a culture extract from *E. coli* coexpressing truncated TPS30 and GGPP synthase. Lower panel: Extract of *E. coli* expressing only GGPP synthase. (B) Mass spectra of the TPS30 diterpene products 1 and 2 as shown in (A). (C) Upper panel: GC-MS chromatogram of a culture extract from *E. coli* coexpressing truncated TPS30, GGPP synthase and *ent*-CPP synthase. Diterpene products are marked with lines and arrows corresponding to authentic standards. Lower panel: Extract of *E. coli* expressing only GGPP synthase and *ent*-CPP synthase. EV, empty vector.



**Table S1. Primers used in this study.**

| <b>Primer name</b>                                           | <b>Sequence 5'-3'</b>             |
|--------------------------------------------------------------|-----------------------------------|
| <b>RT-PCR</b>                                                |                                   |
| <i>TPS6-F</i>                                                | GAGGTCGGGGTAGCTTCG                |
| <i>TPS6-R</i>                                                | CTCTCCAGCGAAGGTGTACC              |
| <i>TPS19-F</i>                                               | GCCACGTACCAACCTTTGATG             |
| <i>TPS19-R</i>                                               | GGGTATTGGGTGGACGTACAAG            |
| <i>TPS20-F</i>                                               | GTTGGAGGCAGCAATGAGGAAC            |
| <i>TPS20-R</i>                                               | CTAAATGGTGATTAGATCAAGG            |
| <i>TPS29-F</i>                                               | GTGTGAAACAAGTGGTAGAGAAG           |
| <i>TPS29-R</i>                                               | GGGTATAGGGTGGAGGTACAAG            |
| <i>Actin 8-F</i>                                             | ATGAAGATTAAGGTCGTGGCAC            |
| <i>Actin 8-R</i>                                             | GTTTTTATCCGAGTTTGAAGAGGC          |
| <b>Cloning of full length and truncated <i>TPS</i> cDNAs</b> |                                   |
| <i>TPS6-F</i>                                                | AAAGTCGACATGGAGGCCATAACAAAATATG   |
| <i>TPS6-F-truncated</i>                                      | AACCATGGCAACGACGAATCCTACAGA       |
| <i>TPS6-R</i>                                                | AAACTCGAGTTAAAGAGTGATGAGATCGACA   |
| <i>TPS9-F-truncated</i>                                      | AACATATGGATGATAAAGAACGTACTIONCGC  |
| <i>TPS9-R</i>                                                | AACTCGAGCTACAACATTTTCAGAGTATGAT   |
| <i>TPS19-F</i>                                               | AACCATGGAAGCAACAAGAATGGGT         |
| <i>TPS19-F-truncated</i>                                     | AACCATGGCATCTACTAAGAGTAGTGATGATC  |
| <i>TPS19-R</i>                                               | AACTCGAGTTATGAAAGGGGTATTGGGTG     |
| <i>TPS20-F</i>                                               | AACCATGGAAGCAATAACTAAAATGGG       |
| <i>TPS20-F-truncated</i>                                     | AACCATGGATCATGAAGCCGCAAATCGT      |
| <i>TPS20-F-truncated (His-tag)</i>                           | AACATATGGATCATGAAGCCGCAAATCGT     |
| <i>TPS20-R</i>                                               | AAACTCGAGCTAAATGGTGATTAGATCAAGGA  |
| <i>TPS22-F-truncated</i>                                     | CACCACTCTTCCCGGAGATCAA            |
| <i>TPS22-R</i>                                               | TCAAAGCGGAAGAGGATGGAAG            |
| <i>TPS25-F-truncated</i>                                     | CACCAACTTCTCTCTTTTCTTGC           |
| <i>TPS25-R</i>                                               | TCAAAGAGGTATTGGATGGAGG            |
| <i>TPS26-F-truncated</i>                                     | AACCATGGCACTTCGTTTAAAGGCCACTAATAC |
| <i>TPS26-R</i>                                               | AAACTCGAG TCAAAGACCGATACGATCGA    |
| <i>TPS29-F</i>                                               | AACCATGGAAGCAATAAGAATAGGTTT       |
| <i>TPS29-F-truncated</i>                                     | AACCATGGCAAGTTCTTCTAAGAAGAGTA     |
| <i>TPS29-R</i>                                               | AACTCGAGTTATGAAAGGGGTATAGGGTG     |
| <i>TPS30-F</i>                                               | AACCATGGCAGTAGCAAGAACGGT          |
| <i>TPS30-F-truncated</i>                                     | AACCATGGCTACTACTAAGAGTTCGACT      |
| <i>TPS30-R</i>                                               | AACTCGAGTCAAACAGGAATGGGATGGAT     |

**Table S2.  $^1\text{H}$ -NMR and  $^{13}\text{C}$ -NMR assignments for the major diterpene product of TPS20c (solvent: benzene- $d_6$ ).**

| position | $\delta_{\text{C}}$ (ppm) | $\delta_{\text{H}}$ (ppm) | Multiplicity, J in Hz |
|----------|---------------------------|---------------------------|-----------------------|
| 1        | 39.2                      | -                         |                       |
| 2        | 39.1                      | 2.01(2H)                  | m                     |
| 3        | 127.1                     | 4.84                      | t, 5.6                |
| 4        | 131.4                     | -                         |                       |
| 5        | 39.5                      | 1.93 (2H)                 | m                     |
| 6        | 26.1                      | 2.03                      | m                     |
|          |                           | 2.07                      | m                     |
| 7        | 125.3                     | 4.91                      | t, 8.4                |
| 8        | 138.3                     | -                         |                       |
| 9        | 38.2                      | 2.33                      | m                     |
|          |                           | 2.16                      | m                     |
| 10       | 30.0                      | 1.82                      | m                     |
|          |                           | 2.02                      | m                     |
| 11       | 140.7                     | -                         |                       |
| 12       | 134.5                     | 5.44                      | d, 1.24               |
| 13       | 32.7                      | -                         |                       |
| 14       | 34.5                      | 1.48 (2H)                 | m                     |
| 15       | 35.4                      | 1.33                      | m                     |
|          |                           | 1.82                      | m                     |
| 16       | 27.2                      | 0.99(3H)                  | s                     |
| 17       | 16.8                      | 1.48(3H)                  | s                     |
| 18       | 18.3                      | 1.47(3H)                  | s                     |
| 19       | 29.3                      | 1.05(3H)                  | s                     |
| 20       | 31.8                      | 1.01(3H)                  | s                     |

**Table S3.  $^1\text{H}$ -NMR and  $^{13}\text{C}$ -NMR assignments for the major diterpene alcohol product of TPS20c (solvent: benzene- $d_6$ ).**

| <b>position</b> | <b><math>\delta_{\text{C}}</math> (ppm)</b> | <b><math>\delta_{\text{H}}</math> (ppm)</b> | <b>Multiplicity, J in Hz</b> |
|-----------------|---------------------------------------------|---------------------------------------------|------------------------------|
| 1               | 47.2                                        | -                                           |                              |
| 2               | 40.2                                        | 1.72                                        | dd, 13.5, 6.1                |
|                 |                                             | 2.25                                        | dd, 13.5, 9.8                |
| 3               | 125.5                                       | 5.12                                        | dd, 9.8, 6.1                 |
| 4               | 133.4                                       | -                                           |                              |
| 5               | 40.4                                        | 2.08 (2H)                                   | m                            |
| 6               | 25.6                                        | 2.09                                        | m                            |
|                 |                                             | 2.18                                        | m                            |
| 7               | 127.4                                       | 4.97                                        | dd, 9.2, 5.6                 |
| 8               | 135.6                                       | -                                           |                              |
| 9               | 39.4                                        | 2.25                                        | m                            |
|                 |                                             | 2.35                                        | m                            |
| 10              | 32.6                                        | 1.49                                        | m                            |
|                 |                                             | 1.58                                        | m                            |
| 11              | 42.0                                        | 1.63                                        | m                            |
| 12              | 60.8                                        | 1.56                                        | m                            |
| 13              | 27.2                                        | 1.25                                        | m                            |
|                 |                                             | 1.50                                        | m                            |
| 14              | 42.2                                        | 1.35                                        | m                            |
|                 |                                             | 1.44                                        | m                            |
| 15              | 23.8                                        | 1.03(3H)                                    | s                            |
| 16              | 16.9                                        | 1.58(3H)                                    | s                            |
| 17              | 17.0                                        | 1.61(3H)                                    | s                            |
| 18              | 72.8                                        | -                                           |                              |
| 19              | 27.0                                        | 1.07(3H)                                    | s                            |
| 20              | 31.6                                        | 1.07(3H)                                    | s                            |
